# Supplementary material for: Chemical, biological and in silico assessment of date (P. dactylifera L.) fruits grown in Ha’il region
Source: Front Chem. 2023 Mar 3;11:1138057. doi: 10.3389/fchem.2023.1138057 (PMC10022733; doi:10.3389/fchem.2023.1138057)
Supplement: Supplementary file 1 [file DataSheet1.docx]

**Chemical, biological and in-silico assessment of date (*P. Dactylifera* L.) fruits grown in Ha'il region**

Abdulmohsen Khalaf Dhahi Alsukaibi,1 Khalaf M. Alenezi,1,* Ashanul Haque,1,* Irfan Ahmad,2 Mohd. Saeed,3 Mahima Verma,4 Irfan Ahmad Ansari,4 Ming-Fa Hsieh5,*

1 Department of Chemistry, College of Science, University of Ha'il, Kingdom of Saudi Arabia.

2 Department of Clinical Laboratory Science, College of Applied Medical Sciences, King Khalid University, Abha, Kingdom of Saudi Arabia.

3 Department of Biology, College of Science, University of Ha'il, Kingdom of Saudi Arabia.

4 Department of Biosciences, Integral University, Lucknow, 226026, India.

5 Department of Biomedical Engineering, Chung Yuan Christian University, 200 Chung Pei Road, Chung Li District, Taoyuan City, Taiwan 32023, Taiwan

E-mail: [a.haque@uoh.edu.sa](mailto:a.haque@uoh.edu.sa) (AH); [k.alenezi@uoh.edu.sa](mailto:k.alenezi@uoh.edu.sa); [mfhsieh@cycu.edu.tw](mailto:mfhsieh@cycu.edu.tw) (MFH)

**Supporting information**

**Figure S1**: IR (ATR) spectra of date fruits extracts.


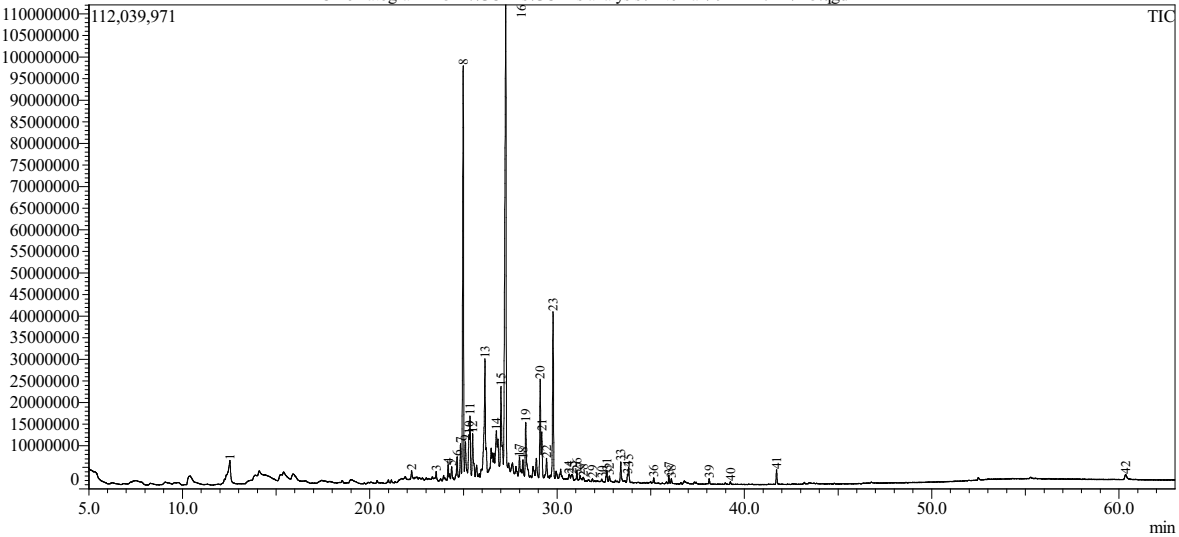


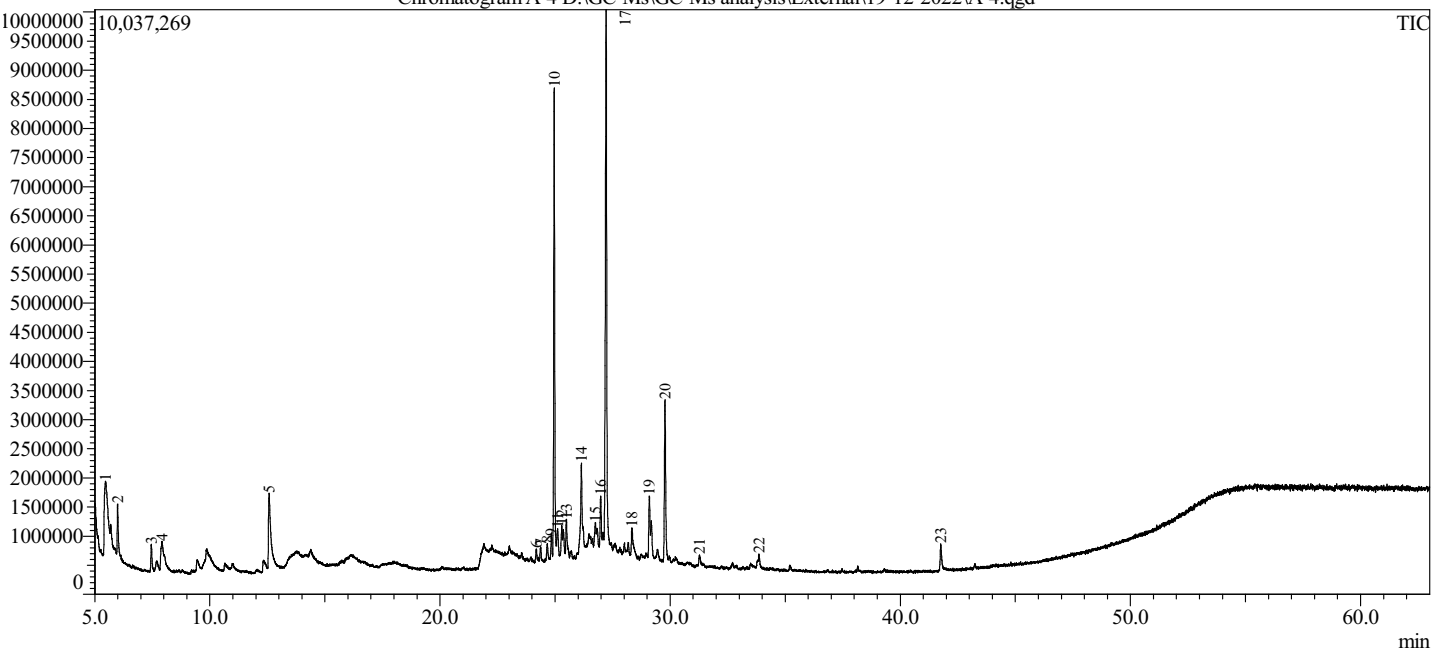


**Figure S2**: Gas chromatography–mass spectrometry (GC-MS) analysis of **M1** (top) and **M2** (bottom). Peaks of major compounds were revealed with different percentage of intensity and retention time (RT).

**Table T1**: Sample, local name, amount used for extraction (in 1:3 w/v MeOH at RT) and solid obtained after lyophilization.

| **Sample Code** | **Local/ethnic name** | **Pieces**  **(Weight, gm)** | **Sample** | **Solid**  **obtained (gm)** |
| --- | --- | --- | --- | --- |
| **M1** | *Shishi* | 3  (36.11) | 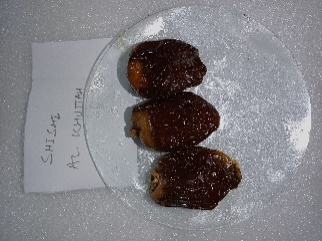 | 9.1 |
| **M2** | *Majdool* | 3  (46.22) | 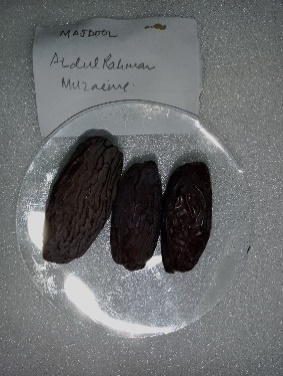 | 15 |

**Table T2**: Types and names of constituents used for the *in-silico* evaluation. Pubmed link for the studied compounds are also give.

| **S. No.** | **Class & Constituents** | **PubMed link/Chart** |
| --- | --- | --- |
| **Carotenoids** | | |
|  | Antheraxanthin | [Antheraxanthin | C40H56O3 - PubChem (nih.gov)](https://pubchem.ncbi.nlm.nih.gov/compound/5281223#section=2D-Structure) |
|  | Cryptoxanthine | [beta-Cryptoxanthin | C40H56O - PubChem (nih.gov)](https://pubchem.ncbi.nlm.nih.gov/compound/5281235#section=2D-Structure) |
|  | Echinenone | [Echinenone | C40H54O - PubChem (nih.gov)](https://pubchem.ncbi.nlm.nih.gov/compound/5281236) |
|  | Flavoxanthin | [Flavoxanthin | C40H56O3 - PubChem (nih.gov)](https://pubchem.ncbi.nlm.nih.gov/compound/5281238#section=2D-Structure) |
|  | Lutein | [Lutein | C40H56O2 - PubChem (nih.gov)](https://pubchem.ncbi.nlm.nih.gov/compound/5281243#section=2D-Structure) |
|  | Lycopene | [Lycopene | C40H56 - PubChem (nih.gov)](https://pubchem.ncbi.nlm.nih.gov/compound/446925) |
|  | Neoxanthin | [(3S,3'S,5R,5'R,6S,6'R,9'Z)-5,6-Epoxy-6',7'-didehydro-5,6,5',6'-tetrahydro-beta,beta-carotene-3,3',5'-triol | C40H56O4 - PubChem (nih.gov)](https://pubchem.ncbi.nlm.nih.gov/compound/12358959) |
|  | Violaxanthin | [Violaxanthin | C40H56O4 - PubChem (nih.gov)](https://pubchem.ncbi.nlm.nih.gov/compound/448438#section=2D-Structure) |
|  | α-carotenes | [alpha-Carotene | C40H56 - PubChem (nih.gov)](https://pubchem.ncbi.nlm.nih.gov/compound/6419725) |
|  | β-carotene | [SID 319295400 - PubChem (nih.gov)](https://pubchem.ncbi.nlm.nih.gov/substance/319295400) |
|  | β-cryptoxanthin | [beta-Cryptoxanthin | C40H56O - PubChem (nih.gov)](https://pubchem.ncbi.nlm.nih.gov/compound/5281235) |
|  | ϒ-carotenes | [gamma-Carotene | C40H56 - PubChem (nih.gov)](https://pubchem.ncbi.nlm.nih.gov/compound/5280791) |
|  | Zeaxanthin | [Zeaxanthin | C40H56O2 - PubChem (nih.gov)](https://pubchem.ncbi.nlm.nih.gov/compound/5280899) |
| **Phenolic acids** | | |
|  | 3-Hydroxybenzoic acid | [3-Hydroxybenzoic acid | C7H6O3 - PubChem (nih.gov)](https://pubchem.ncbi.nlm.nih.gov/compound/7420#section=3D-Conformer) |
|  | Caffeic Acid | [Caffeic acid | C9H8O4 - PubChem (nih.gov)](https://pubchem.ncbi.nlm.nih.gov/compound/689043) |
|  | Cathechin | [Cianidanol | C15H14O6 - PubChem (nih.gov)](https://pubchem.ncbi.nlm.nih.gov/compound/9064#section=2D-Structure) |
|  | Chlorogenic Acid/3-Caffeoylquinic Acid | [Chlorogenic acid | C16H18O9 - PubChem (nih.gov)](https://pubchem.ncbi.nlm.nih.gov/compound/1794427) |
|  | Cinnamic Acid | [Cinnamic acid | C9H8O2 - PubChem (nih.gov)](https://pubchem.ncbi.nlm.nih.gov/compound/444539) |
|  | Ellagic Acid | [Ellagic acid | C14H6O8 - PubChem (nih.gov)](https://pubchem.ncbi.nlm.nih.gov/compound/5281855) |
|  | Esculetin | [Esculetin | C9H6O4 - PubChem (nih.gov)](https://pubchem.ncbi.nlm.nih.gov/compound/5281416) |
|  | Ferulic Acid | [Ferulic acid | C10H10O4 - PubChem (nih.gov)](https://pubchem.ncbi.nlm.nih.gov/compound/Ferulic-acid#section=3D-Conformer) |
|  | Gallic Acid | [Gallic acid | C7H6O5 - PubChem (nih.gov)](https://pubchem.ncbi.nlm.nih.gov/compound/370) |
|  | Hydroxyphenylacetic Acid | [4-Hydroxyphenylacetic acid | C8H8O3 - PubChem (nih.gov)](https://pubchem.ncbi.nlm.nih.gov/compound/127) |
|  | Isovanillic Acid | [3-Hydroxy-4-methoxybenzoic acid | C8H8O4 - PubChem (nih.gov)](https://pubchem.ncbi.nlm.nih.gov/compound/12575#section=3D-Conformer) |
|  | Itaconic Acid | [Itaconic acid | C5H6O4 - PubChem (nih.gov)](https://pubchem.ncbi.nlm.nih.gov/compound/811) |
|  | m-coumaric acid | [3-Hydroxycinnamic acid | C9H8O3 - PubChem (nih.gov)](https://pubchem.ncbi.nlm.nih.gov/compound/637541#section=3D-Conformer) |
|  | o-cinnamic acid | *See chart* |
|  | o–coumaric acid | [2-Hydroxycinnamic acid | C9H8O3 - PubChem (nih.gov)](https://pubchem.ncbi.nlm.nih.gov/compound/637540#section=3D-Conformer) |
|  | 5-o-caffeoylshikimic acid | [5-O-Caffeoylshikimic acid | C16H16O8 - PubChem (nih.gov)](https://pubchem.ncbi.nlm.nih.gov/compound/5281762#section=2D-Structure) |
|  | p-coumaric acid | [4-Hydroxycinnamic acid | C9H8O3 - PubChem (nih.gov)](https://pubchem.ncbi.nlm.nih.gov/compound/637542) |
|  | Pelargonin | [Pelargonin | C27H31O15+ - PubChem (nih.gov)](https://pubchem.ncbi.nlm.nih.gov/compound/441772#section=3D-Conformer) |
|  | Phenylacetic Acid | [Phenylacetic acid | C8H8O2 - PubChem (nih.gov)](https://pubchem.ncbi.nlm.nih.gov/compound/999) |
|  | P-Hydroxybenzoic Acid | [4-Hydroxybenzoic acid | C7H6O3 - PubChem (nih.gov)](https://pubchem.ncbi.nlm.nih.gov/compound/135#section=3D-Conformer) |
|  | Protocatechuic Acid | [3,4-Dihydroxybenzoic acid | C7H6O4 - PubChem (nih.gov)](https://pubchem.ncbi.nlm.nih.gov/compound/72#section=3D-Conformer) |
|  | Sinapic Acid | [Sinapic acid | C11H12O5 - PubChem (nih.gov)](https://pubchem.ncbi.nlm.nih.gov/compound/637775#section=3D-Conformer) |
|  | Syringic Acid | [Syringic acid | C9H10O5 - PubChem (nih.gov)](https://pubchem.ncbi.nlm.nih.gov/compound/10742#section=3D-Conformer) |
|  | Tannic Acid | [Tannic acid | C76H52O46 - PubChem (nih.gov)](https://pubchem.ncbi.nlm.nih.gov/compound/16129778#section=2D-Structure) |
|  | Tyrosol | [2-(4-Hydroxyphenyl)ethanol | C8H10O2 - PubChem (nih.gov)](https://pubchem.ncbi.nlm.nih.gov/compound/10393) |
|  | Vanillic Acid | [Vanillic acid | C8H8O4 - PubChem (nih.gov)](https://pubchem.ncbi.nlm.nih.gov/compound/8468#section=3D-Conformer) |
|  | Chrysoeriol | [Chrysoeriol | C16H12O6 - PubChem (nih.gov)](https://pubchem.ncbi.nlm.nih.gov/compound/5280666) |
|  | 4-Caffeoylshikimic acid | [4-o-Caffeoylshikimic acid | C16H16O8 - PubChem (nih.gov)](https://pubchem.ncbi.nlm.nih.gov/compound/49821869) |
|  | 5-Caffeoylshikimic acid | [5-O-Caffeoylshikimic acid | C16H16O8 - PubChem (nih.gov)](https://pubchem.ncbi.nlm.nih.gov/compound/5281762) |
|  | 3-Caffeoylshikimic acid | [3-Caffeoylshikimic acid | C16H16O8 - PubChem (nih.gov)](https://pubchem.ncbi.nlm.nih.gov/compound/10131826) |
|  | Salicylic acid | [Salicylic acid | HOC6H4COOH - PubChem (nih.gov)](https://pubchem.ncbi.nlm.nih.gov/compound/338) |
|  | Curcumin | [Curcumin | C21H20O6 - PubChem (nih.gov)](https://pubchem.ncbi.nlm.nih.gov/compound/969516) |
|  | Isorhamnetin | [Isorhamnetin | C16H12O7 - PubChem (nih.gov)](https://pubchem.ncbi.nlm.nih.gov/compound/5281654) |
|  | Resorcinol | [Resorcinol | C6H6O2 - PubChem (nih.gov)](https://pubchem.ncbi.nlm.nih.gov/compound/5054) |
| **Flavonoids** | | |
|  | Apigenin | [Apigenin | C15H10O5 - PubChem (nih.gov)](https://pubchem.ncbi.nlm.nih.gov/compound/5280443#section=3D-Conformer) |
|  | Diosmetin | [Diosmetin | C16H12O6 - PubChem (nih.gov)](https://pubchem.ncbi.nlm.nih.gov/compound/5281612#section=3D-Conformer) |
|  | Flavonol glycoside | [Flavonol 3-O-D-glucoside | C21H20O8 - PubChem (nih.gov)](https://pubchem.ncbi.nlm.nih.gov/compound/11953828) |
|  | Isoquerectin | [Isoquercitrin | C21H20O12 - PubChem (nih.gov)](https://pubchem.ncbi.nlm.nih.gov/compound/Isoquercitrin#section=3D-Conformer) |
|  | Kempferol | [Kaempferol | C15H10O6 - PubChem (nih.gov)](https://pubchem.ncbi.nlm.nih.gov/compound/5280863#section=3D-Conformer) |
|  | Luteolin | [Luteolin | C15H10O6 - PubChem (nih.gov)](https://pubchem.ncbi.nlm.nih.gov/compound/5280445#section=3D-Conformer) |
|  | Procyanidin | [Procyanidin | C30H26O13 - PubChem (nih.gov)](https://pubchem.ncbi.nlm.nih.gov/compound/107876#section=3D-Conformer) |
|  | Quercetin | [Quercetin | C15H10O7 - PubChem (nih.gov)](https://pubchem.ncbi.nlm.nih.gov/compound/5280343#section=3D-Conformer) |
|  | Rutin | [Rutin | C27H30O16 - PubChem (nih.gov)](https://pubchem.ncbi.nlm.nih.gov/compound/5280805#section=3D-Conformer) |
|  | Procyanidin B1 | [Procyanidin B1 | C30H26O12 - PubChem (nih.gov)](https://pubchem.ncbi.nlm.nih.gov/compound/11250133) |
|  | Procyanidin B2 | [Procyanidin B2 | C30H26O12 - PubChem (nih.gov)](https://pubchem.ncbi.nlm.nih.gov/compound/122738) |
|  | Procyanidin A2 | [Proanthocyanidin A2 | C30H24O12 - PubChem (nih.gov)](https://pubchem.ncbi.nlm.nih.gov/compound/124025) |
|  | Kaempferol hexoside | [Astragalin | C21H20O11 - PubChem (nih.gov)](https://pubchem.ncbi.nlm.nih.gov/compound/5282102#section=2D-Structure) |
|  | Luteolin-7-O-β-D–glucoside | [SID 12015660 - PubChem (nih.gov)](https://pubchem.ncbi.nlm.nih.gov/substance/12015660) |
|  | Isorhamnetin-3-O-glucoside | [isorhamnetin-3-O-glucoside | C22H22O12 - PubChem (nih.gov)](https://pubchem.ncbi.nlm.nih.gov/compound/5318645) |
|  | Naringin | [Naringin | C27H32O14 - PubChem (nih.gov)](https://pubchem.ncbi.nlm.nih.gov/compound/442428) |
|  | Myricetin | [Myricetin | C15H10O8 - PubChem (nih.gov)](https://pubchem.ncbi.nlm.nih.gov/compound/5281672) |
|  | Morin | [Morin | C15H10O7 - PubChem (nih.gov)](https://pubchem.ncbi.nlm.nih.gov/compound/5281670) |
|  | Galangin | [Galangin | C15H10O5 - PubChem (nih.gov)](https://pubchem.ncbi.nlm.nih.gov/compound/5281616) |
|  | Luteolin-7-O-rutinoside | [luteolin-7-O-rutinoside | C27H30O16 - PubChem (nih.gov)](https://pubchem.ncbi.nlm.nih.gov/compound/14032966) |
|  | Quercetin3-O-rutinoside | [Rutin | C27H30O16 - PubChem (nih.gov)](https://pubchem.ncbi.nlm.nih.gov/compound/5280805) |
|  | Isorhamnetin-3-O-rutinoside | [Narcissoside | C28H32O16 - PubChem (nih.gov)](https://pubchem.ncbi.nlm.nih.gov/compound/5481663) |
|  | kaempferol-3-glucoside | [Astragalin | C21H20O11 - PubChem (nih.gov)](https://pubchem.ncbi.nlm.nih.gov/compound/5282102) |
|  | glucopyranoside | [D-Glucose | C6H12O6 - PubChem (nih.gov)](https://pubchem.ncbi.nlm.nih.gov/compound/5793) |
|  | Isoquercitrin | [Isoquercitrin | C21H20O12 - PubChem (nih.gov)](https://pubchem.ncbi.nlm.nih.gov/compound/5280804) |
|  | Daidzein | [Daidzein | C15H10O4 - PubChem (nih.gov)](https://pubchem.ncbi.nlm.nih.gov/compound/5281708) |
|  | Genistein | [Genistein | C15H10O5 - PubChem (nih.gov)](https://pubchem.ncbi.nlm.nih.gov/compound/5280961) |
|  | Glycitein | [Glycitein | C16H12O5 - PubChem (nih.gov)](https://pubchem.ncbi.nlm.nih.gov/compound/5317750) |
|  | Formononetin | [Formononetin | C16H12O4 - PubChem (nih.gov)](https://pubchem.ncbi.nlm.nih.gov/compound/5280378) |
|  | Petunidin | [Petunidin | C16H13O7+ - PubChem (nih.gov)](https://pubchem.ncbi.nlm.nih.gov/compound/441774) |
|  | **Tocopherol, Tocotrienol, & Phytoestrogens** | |
|  | campesterol | [Campesterol | C28H48O - PubChem (nih.gov)](https://pubchem.ncbi.nlm.nih.gov/compound/173183) |
|  | cholesterol | [Cholesterol | C27H46O - PubChem (nih.gov)](https://pubchem.ncbi.nlm.nih.gov/compound/5997) |
|  | tocotrienol | [Tocotrienol | C26H38O2 - PubChem (nih.gov)](https://pubchem.ncbi.nlm.nih.gov/compound/9929901) |
|  |  |  |
|  | ϒ-tocopherol | [gamma-Tocopherol | C28H48O2 - PubChem (nih.gov)](https://pubchem.ncbi.nlm.nih.gov/compound/92729) |
|  | α- Tocopherol | [SID 57393415 - PubChem (nih.gov)](https://pubchem.ncbi.nlm.nih.gov/substance/57393415) |
|  | α-Tocotrienol | [alpha-Tocotrienol | C29H44O2 - PubChem (nih.gov)](https://pubchem.ncbi.nlm.nih.gov/compound/5282347) |
|  | β-Sitosterol | [beta-Sitosterol | C29H50O - PubChem (nih.gov)](https://pubchem.ncbi.nlm.nih.gov/compound/222284) |
|  | Δ5,24-stigmastadienol | [5,24-Stigmastadienol | C29H48O - PubChem (nih.gov)](https://pubchem.ncbi.nlm.nih.gov/compound/70130285) |
|  | Δ5-avenasterol | [Fucosterol | C29H48O - PubChem (nih.gov)](https://pubchem.ncbi.nlm.nih.gov/compound/5281326) |
|  | Δ7-avenasterol | [delta7-Avenasterol | C29H48O - PubChem (nih.gov)](https://pubchem.ncbi.nlm.nih.gov/compound/12795736) |
|  | Δ7-stigmastenol | [SID 319287569 - PubChem (nih.gov)](https://pubchem.ncbi.nlm.nih.gov/substance/319287569) |
|  | Matairesinol | [Matairesinol | C20H22O6 - PubChem (nih.gov)](https://pubchem.ncbi.nlm.nih.gov/compound/119205) |
|  | Lariciresinol | [Lariciresinol | C20H24O6 - PubChem (nih.gov)](https://pubchem.ncbi.nlm.nih.gov/compound/332427) |
|  | Secoisolariciresinol | [Secoisolariciresinol | C20H26O6 - PubChem (nih.gov)](https://pubchem.ncbi.nlm.nih.gov/compound/65373) |
|  | Pinoresinol | [Pinoresinol | C20H22O6 - PubChem (nih.gov)](https://pubchem.ncbi.nlm.nih.gov/compound/73399) |
|  | Coumestrol | [Coumestrol | C15H8O5 - PubChem (nih.gov)](https://pubchem.ncbi.nlm.nih.gov/compound/5281707) |

**Table T3**. Tentative identification of metabolites in methanolic extract of P. dactylifera fruits using GC-MS technique.

| **Compound** | **Ref** |
| --- | --- |
| Quinic acid | Biomass Conversion and Biorefinery (2022) 12:3771–3781 |
| Oleic acid | Biomass Conversion and Biorefinery (2022) 12:3771–3781 |
| Trans-13-Octadecenoic acid | Biomass Conversion and Biorefinery (2022) 12:3771–3781 |
| Stearic acid | 10.1039/C5FO01570G |
| O-Caffeoyl shikimic acid | 10.1039/C5FO01570G |
| Luteolin | 10.1039/C5FO01570G |
| Trihydroxy-octadecenoic acid | 10.1039/C5FO01570G |
| Aspartic acid | doi:10.1111/ijfs.14783 |
| Formic Acid Hydrazide | https://doi.org/10.1016/j.sjbs.2019.11.029 |
| Linoleic acid | <https://doi.org/10.1016/j.phytol.2019.03.004> |
| 6-hydroxy 7 methoxy coumarin | <https://doi.org/10.1016/j.phytol.2019.03.004> |
| 4-Hydroxy- 6 methylcoumarin | <https://doi.org/10.1016/j.phytol.2019.03.004> |
